# Supplementary material
Source: PubMed Central journal article supplement (PMC3131784)
Supplement: NIHMS303702-supplement-sup.pdf [file NIHMS303702-supplement-sup.pdf]

# Sup. Figure 1

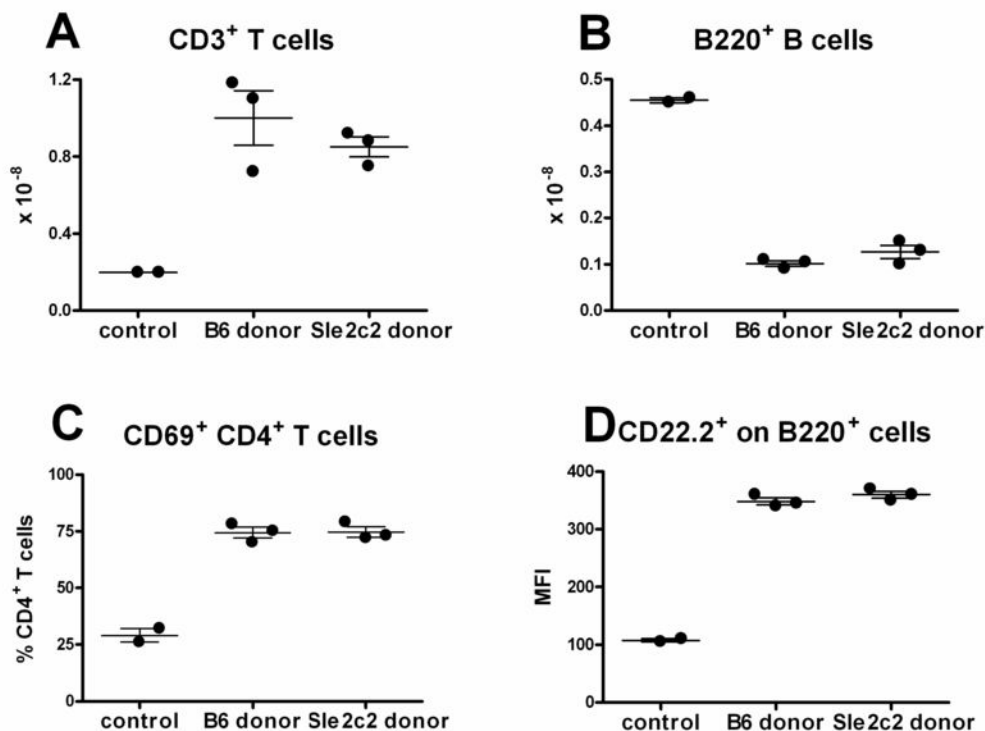

**Supplemental Fig. 1.** cGVHD resistance in B6.*Sle2c2* mice is not due to hypo-responsive T cell alloresponses. Phenotypes of BDF1 mice that have received either B6 or B6.*Sle2c2* splenocytes 2 wks after PF1 aGVHD. Unmanipulated BDF1 mice served as controls. **A.** CD3<sup>+</sup> cell numbers. **B.** B220<sup>+</sup> B cell numbers. **C.** CD69 expression on CD4<sup>+</sup> T cells. **D.** CD22.2<sup>+</sup> expression on B220<sup>+</sup> B cells. The graphs show means and SEMs. Values for either B6 or B6.*Sle2c2* donors were significantly from controls for all phenotypes ( $p < 0.01$ ).

## Sup. Fig. 2

### A

|                   |                                                            |                      |     |
|-------------------|------------------------------------------------------------|----------------------|-----|
| Homo sapiens      | SDWSPSLELRTERAPVRLDHWWRQRLDPRTVQLFWKPVPLEE--DSGRIQGYVVSWRP | SGQAGAILPLCNYTELSCT  | 396 |
| Pan troglodytes   | SDWSPSLELRTEWAPVRLDHWWRQRLDPRTVQLFWKPVPLEE--DSGRIQGYVVSWRP | SGQAGAILPLCNYTELSCT  | 396 |
| Canis familiaris  | SDWSPSLTLTTAQRAPVRLDHWWRQRLDPRTADMQLFWKPTPL--DRYSGQIQGYLV  | PAGPAGASPPLCNYTELSCT | 396 |
| Mus musculus      | SDWSPGLQLRPTMKAPTIRLDHWQKKQLDPGTVSVQLFWKPTPLQEDSGQIQGYLLSW | SPDHQGDHLCNYTQLSCI   | 399 |
| Rattus norvegicus | SDWSPGLQLRPTIKAPTIRLDHWQKKHLDPETVRMQLFWKPTPLQKDSGQIQGYLLSW | SPDGQGRIMHLCNYTELSCT | 399 |
| Gallus gallus     | SDWVSRRNYTTHEKAPGKLDHWSTR-TAAGRMEVQLRWKAPRQEQANGRVLGYRVALG | SRRRGREPQTVCNQDTHCD  | 350 |
| Danio rerio       | SDWSDPKTATTLNKAPGRLDHWLKVN-----NQTAQLYWKPSQQFRANGQNLSVSDSK | DTTKR-----LCVITETVCF | 376 |

### B

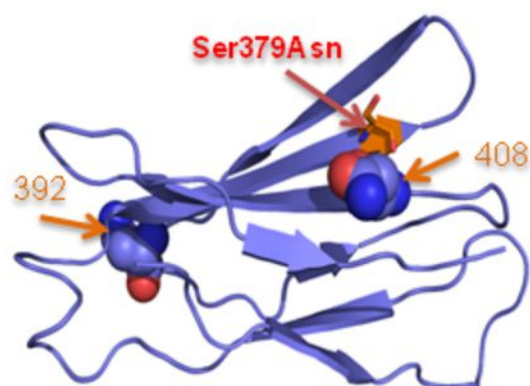

### C

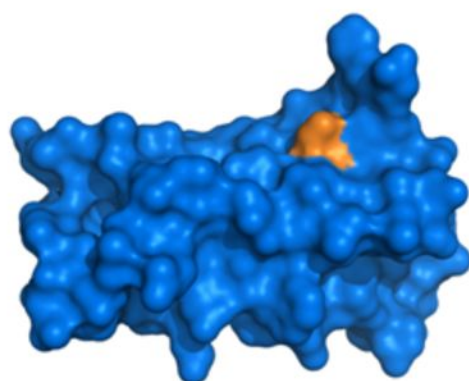

**Supplemental Fig. 2.** Analysis of the rs13477964 Ser379Asn polymorphism in the *Csf3r* gene. **A.** The Ser379Asn is only conserved between the mouse and rat gene, but not with five other mammalian species. The amino acids corresponding to the mouse Ser379Asn are boxed in red. Ribbon (**B**) and filled (**C**) structure of the predicted FNIII domain that contains the Ser379Asn residue shown in orange. Also shown in B are the positions of two neighboring predicted N-linked glycosylated Asn (392 and 408).
